# Supplementary material
Source: publisher figshare collection journal article supplement (https://sage.figshare.com/ndownloader/files/20225334)
Supplement: Supplementary file 1 [file 20225334]

## Supplementary Tables

**Table S1**

Characteristics of 12 longitudinal population-based studies on the impact of informal caregiving on all-cause mortality (the reference group is non-caregivers)

| ID | Study                              | Years of study | Country           | CG age (Sex)   | Follow-up period (year.month) | Data**     | Care receiver                               | Reason for providing care                                                            | Total N |        | Deaths        |               | Number of collapsed HRs | Fully Adjusted HR(95%CI) |
|----|------------------------------------|----------------|-------------------|----------------|-------------------------------|------------|---------------------------------------------|--------------------------------------------------------------------------------------|---------|--------|---------------|---------------|-------------------------|--------------------------|
|    |                                    |                |                   |                |                               |            |                                             |                                                                                      | Non CG  | CG     | Non CG        | CG            |                         |                          |
| 1  | Schulz and Beach, 1999             | 1993-1998      | US                | 66-96 (mixed)  | 5.5                           | CHS        | Spouse                                      | Difficulties with performing at least one ADL or IADL tasks                          | 427     | 317    | 40<br>9.4%    | 50<br>15.8%   | 2                       | 1.37<br>(0.95-1.98) †    |
| 2  | Fredman et al., 2008               | 1997-2005      | US                | 70-79 (mixed)  | 8.4                           | Health ABC | Family member, friends, neighbors or others | A child or a disabled or sick adult                                                  | 2369    | 680    | 521<br>22%    | 140<br>20.6%  | #NA                     | 1.15<br>(0.94-1.40)      |
| 3  | O'Reilly et al., 2008              | 2001-2005      | Northern Ireland  | 16+ (mixed)    | 4.0                           | NIMS       | Family member, friends, neighbors or others | Long-term physical or mental ill health or disability or problems related to old age | 974450  | 162884 | 39920<br>3.5% | 3128<br>1.9%  | 6                       | 0.76<br>(0.74-0.79) •†   |
| 4  | Brown et al., 2009                 | 1993-2000      | US                | 70+ (mixed)    | 7.0                           | AHEAD      | Spouse                                      | Difficulties with performing at least one ADL or IADL tasks                          | 2732    | 644    | 756<br>27.6%  | 153<br>23.7%  | 2                       | 0.79<br>(0.63-0.99) •†   |
| 5  | Ramsay, Grundy, and O'Reilly, 2013 | 2001-2009      | England and Wales | 35-74 (mixed)  | 8.8                           | LSEW       | Family member, friends, neighbors or others | Long-term physical or mental ill health or disability or problems related to old age | 145927  | 31247  | 8658<br>5.9%  | 1613<br>5.16% | 4                       | 0.81<br>(0.77-0.85) •†   |
| 6  | Roth et al., 2013                  | 2004-2012      | US                | 63.27* (mixed) | 8.0                           | REGARDS    | Family member                               | Chronic illness or disability                                                        | 3503    | 3503   | 315<br>9%     | 264<br>7.5%   | #NA                     | 0.82<br>(0.70-0.97) •    |

|    |                                   |           |                  |                |      |               |                                             |                                                                                      |        |        |               |              |     |                        |
|----|-----------------------------------|-----------|------------------|----------------|------|---------------|---------------------------------------------|--------------------------------------------------------------------------------------|--------|--------|---------------|--------------|-----|------------------------|
| 7  | Fredman et al., 2015              | 1999-2012 | US               | 81* (female)   | 13.0 | Caregiver-SOF | Relative or friend                          | Difficulties with performing at least one ADL or IADL tasks                          | 694    | 374    | 338<br>48.7%  | 145<br>38.8% | #NA | 0.77<br>(0.62-0.95) •  |
| 8  | O'Reilly et al., 2015             | 2011-2013 | Northern Ireland | 25+ (mixed)    | 2.9  | NIMS          | Family member, friends, neighbors or others | Long-term physical or mental ill health or disability or problems related to old age | 938937 | 183842 | 26892<br>2.9% | 2443<br>1.3% | 3   | 0.73<br>(0.70-0.75) •† |
| 9  | †Caputo, Pavalko, and Hardy, 2016 | 1984-2012 | US               | 47-61 (female) | 28.0 | NLS_MW        | Spouse, parents, or others                  | Chronically ill and disabled persons                                                 | 1796   | 459    | 794<br>44.2%  | 230<br>50.1% | 3   | 1.03<br>(0.90-1.19)    |
| 10 | Leggett et al., 2019              | 2000-2012 | US               | 51+ (mixed)    | 12   | HRS           | Spouse                                      | Difficulties with performing at least one ADL tasks/Dementia                         | 7841   | 2809   | 2218<br>28.3% | 698<br>24.9% | 2   | 0.72<br>(0.65-0.79) •† |
| 11 | Miyawaki et al., 2019             | 2000-2010 | Japan            | 47-77 (mixed)  | 10   | Komo-Ise      | Relatives or friends                        | Disabled, difficulties with performing at least one ADL and IADL tasks               | 6742   | 1342   | 760<br>11.3%  | 105<br>7.8%  | #NA | 0.97<br>(0.79-1.19)    |
| 12 | Shu et al., 2019                  | 2005-2015 | Australia        | 70+ (male)     | 10   | CHAMP         | Someone                                     | Long-term illness, disability, or other problems                                     | 1427   | 189    | 443<br>31%    | 52<br>27.5%  | #NA | 0.94<br>(0.67-1.32)    |

Notes. † Out-of-home caregivers were excluded because their definition did not meet the inclusion criteria.

\* The mean of caregivers' age.

\*\* CHS: Cardiovascular Health Study, AHEAD: Asset and Health Dynamics (AHEAD) cohort of HRS, REGARDS: The Reasons for Geographic and Racial Differences in Stroke, Caregiver-SOF: Caregiver-Study of Osteoporotic Fractures (caregiver-SOF), LSEW: Longitudinal Study of England and Wales (LS), NIMS: The Northern Ireland Mortality Study (NIMS), Health ABC: The Health, Aging, and Body Composition, NLS\_MW: National Longitudinal Survey of Mature Women, HRS: Health and Retirement Study, CHAMP: Concord Health and Aging in Men Project.

\*\*\* CG: Caregiver, Non-CG: Non-Caregiver.

# NA: Not Applicable: The study reported the overall effect of informal caregiving on mortality.

†Calculated using the fixed-effect model.

- $P \leq 0.05$

**Table S2**

Random-effects meta-regression model of the length of follow-up years on the natural logarithm of the 12 effect sizes

| Variable                      | Coefficient               | SE    | Z     | P>  z | 95% Confidence Interval |
|-------------------------------|---------------------------|-------|-------|-------|-------------------------|
|                               | (B)                       |       |       |       |                         |
| The length of follow-up years | 0.008                     | 0.007 | 1.18  | 0.237 | -0.005_0.022            |
| Constant                      | -0.238                    | 0.085 | -2.81 | 0.005 | -0.405_-0.072           |
| Heterogeneity                 | Adjusted R-squared=14.22% |       |       |       |                         |
| Indices                       | I-squared residual=73.64% |       |       |       |                         |

Notes. Outcome variable is the natural logarithm of effect sizes (HRs).

**Table S3**

Computed total effect for studies included in this meta-analysis and Roth and colleagues' (2015) review

| Study                                 | Fully Adjusted<br>HR (95%CI)<br>(present meta-<br>analysis) | Fully Adjusted<br>HR (95%CI)<br>(Roth et al. (2013) |
|---------------------------------------|-------------------------------------------------------------|-----------------------------------------------------|
| Schulz and Beach, 1999                | 1.37<br>(0.95-1.98)                                         | 1.37<br>(0.90-2.07)                                 |
| O'Reilly et al., 2008                 | 0.76<br>(0.74-0.79)                                         | 0.74<br>(0.71-0.76)                                 |
| Brown et al., 2009                    | 0.79<br>(0.63-0.99)                                         | 0.79<br>(0.66-0.94)                                 |
| Ramsay, Grundy, and<br>O'Reilly, 2013 | 0.81<br>(0.77-0.85)                                         | 0.83<br>(0.79-0.88)                                 |
